# Supplementary material
Source: publisher site journal article supplement (https://www.dovepress.com/article/400408)
Supplement: Supplementary file 1 [file get_supplementary_file.php]

# CONSORT Diagram breathing exercises study

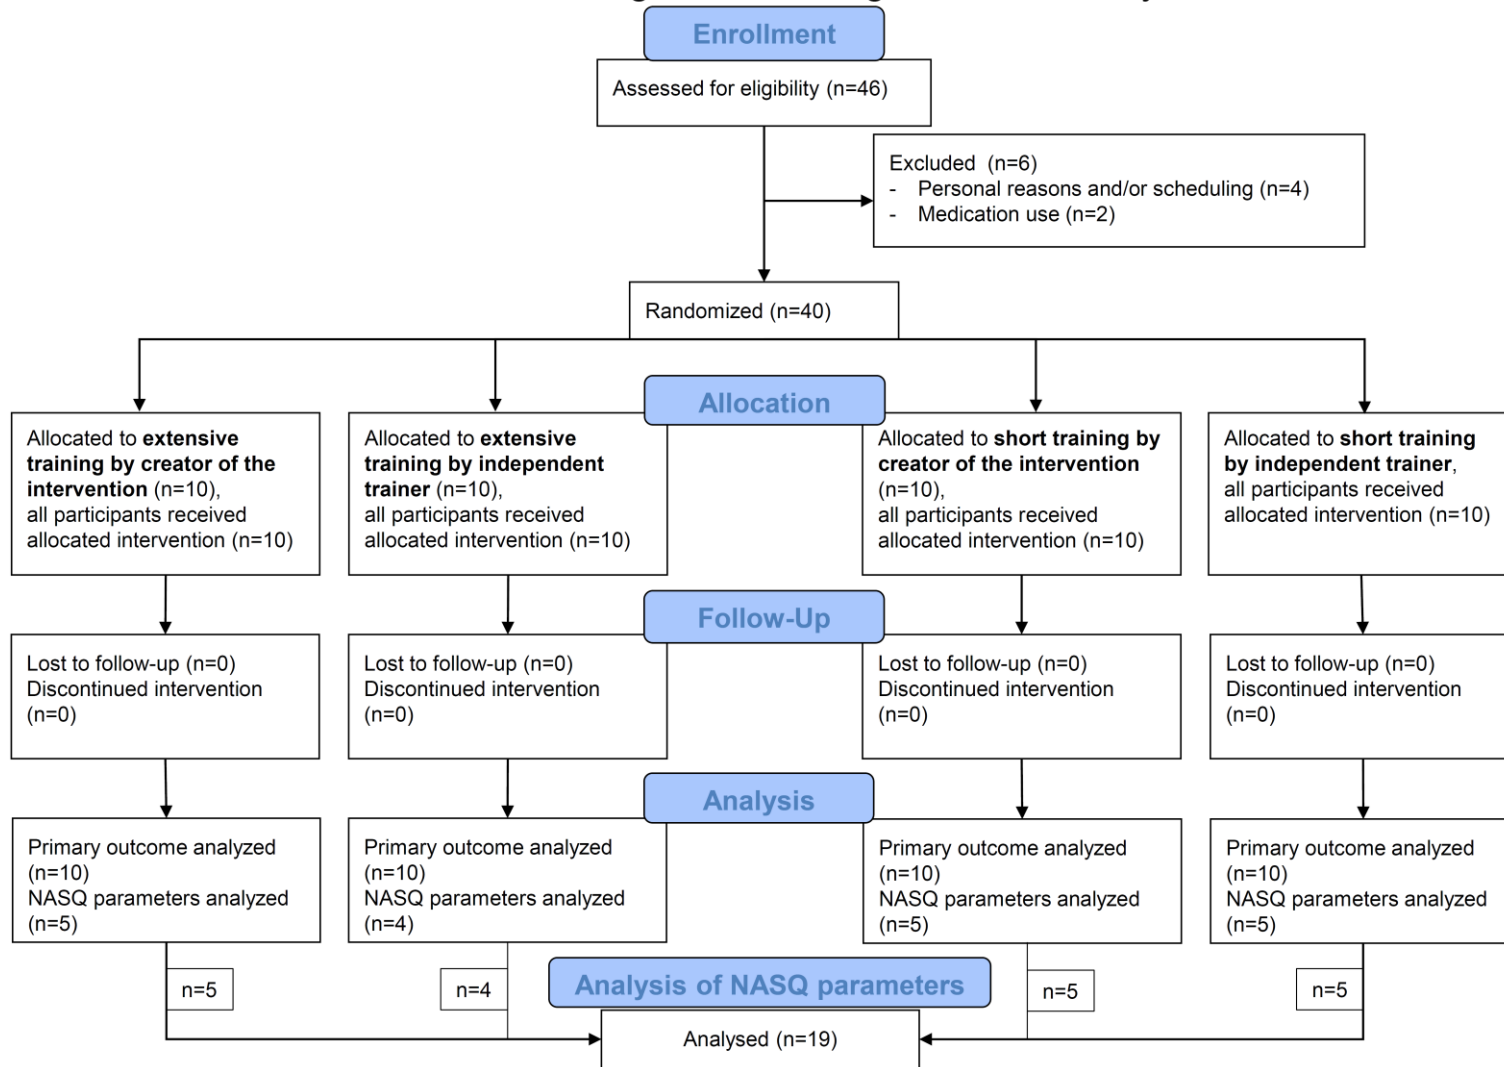

**Supplemental Figure 1.** Flowchart (Consort diagram) of the breathing exercises study.

## CONSORT Diagram endotoxemia study

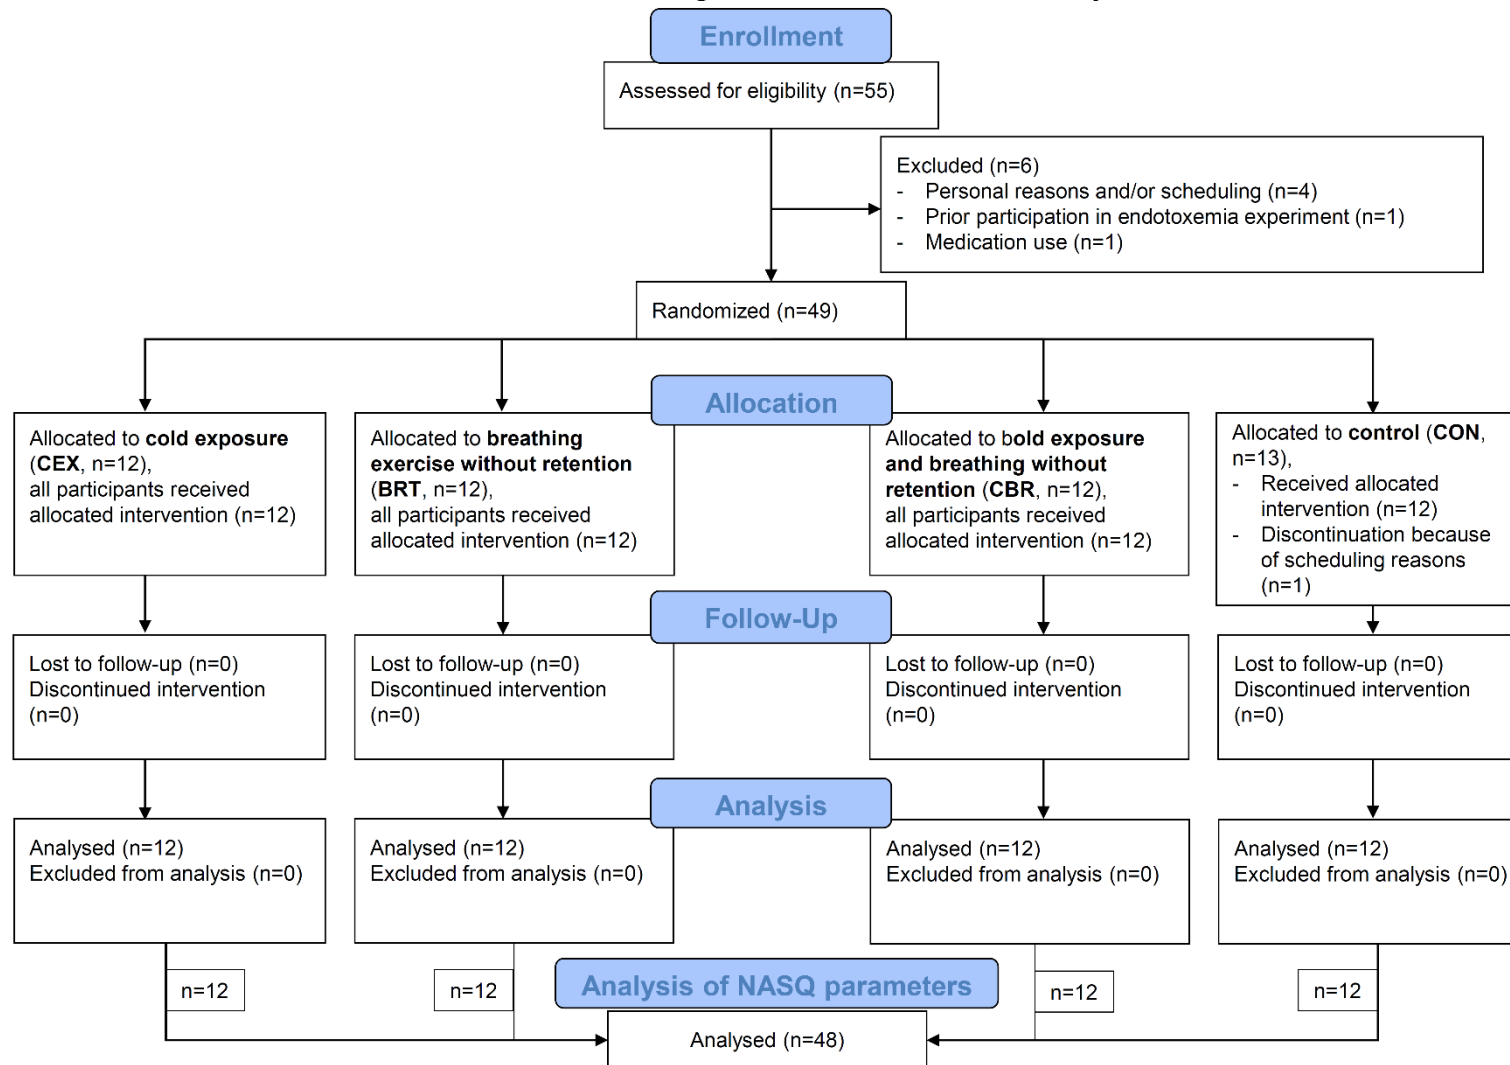

**Supplemental Figure 2.** Flowchart (Consort diagram) of the endotoxemia study.
